# Supplementary material for: Evaluating the implementation and effectiveness of a multi-component intervention to reduce post-surgical opioid prescribing: study protocol of a mixed-methods design
Source: PubMed Central journal article supplement — BMJ Open. 2019 Jun 3;9(6):e030404. doi: 10.1136/bmjopen-2019-030404 (PMC6561445; doi:10.1136/bmjopen-2019-030404), 2019-06-03
Supplement: bmjopen-2019-030404.reviewer_comments.pdf [file bmjopen-2019-030404.reviewer_comments.pdf]

## PEER REVIEW HISTORY

BMJ Open publishes all reviews undertaken for accepted manuscripts. Reviewers are asked to complete a checklist review form (<http://bmjopen.bmj.com/site/about/resources/checklist.pdf>) and are provided with free text boxes to elaborate on their assessment. These free text comments are reproduced below.

## ARTICLE DETAILS

|                            |                                                                                                                                                                        |
|----------------------------|------------------------------------------------------------------------------------------------------------------------------------------------------------------------|
| <b>TITLE (PROVISIONAL)</b> | Evaluating the implementation and effectiveness of a multi-component intervention to reduce post-surgical opioid prescribing: study protocol of a mixed-methods design |
| <b>AUTHORS</b>             | Stulberg, Jonah; Schäfer, Willemijn; Shallcross, Meagan; Lambert, Bruce; Huang, Reiping; Holl, Jane; Bilimoria, Karl; Johnson, Julie                                   |

This article was not externally reviewed at BMJ Open. Protocols that have been independently assessed prior to submission to BMJ Open are usually fast-tracked to publication on the grounds that further substantial changes will not be possible. This independent assessment will usually be external, independent review for both a substantial grant award from a non-commercial or government funder and ethics approval.
